# Supplementary material for: Acetylation-defective mutants of Pparγ are associated with decreased lipid synthesis in breast cancer cells
Source: PubMed Central journal article supplement (PMC4202124; doi:10.18632/oncotarget.2371), 2014-08-19
Supplement: oncotarget-05-7303-s001.pdf [file oncotarget-05-7303-s001.pdf]

# Acetylation-defective mutants of Ppary are associated with decreased lipid synthesis in breast cancer cells

## Supplementary Material

A

Total sequence coverage with two digests:

435/475 = 92 % coverage

```
1 MVDTEMPFWP TNFGISSVDL
21 XVMEDHSHSF DIKPFITVDF SSISAPHYED IPFTRADPMV ADYKYDLKLQ
71 EYQSAIKVEP ASPYYSEKT QLYNRPHEEP SNSLMAIECR VCGDKASGFH
121 YGVHACEGCK GFFRRTIRLK LIYDRCDLNC RIHKKS RNKC QYCRFQKCLA
171 VGM SHNAIRF GRMPQAEKEK LLAEISSDID QLNPE SADR ALAKHLYDSY
221 IKSFP LTKAK ARAILTGKTT DKSPFVIYDM NSLMMGEDKI KFKHITPLQE
271 QSKEVAIRIF QGCQFRSVEA VQEITEYAKN IPGFINDLN DQVTLKYG V
321 HEI IY TMLAS LMNKDGLIS EGQGFMTREF LKSLRKPF GD FMEPKFEFAV
371 KFNAL EDDS DLAI FIAVII LSGDRPGLLN VKPIEDIQDN LLQALELQLK
421 LNHPESSQLF AKVLQKMTDL RQIVTEHVQL LHVIKKTETD MSLHPLLQEI
471 YKDLY
```

blue letters: only trypsin data

red letters: only chymotrypsin data

green letters: sequences from both trypsin and chymo digests

B

```
1 MVDTEMPFWP TNFGISSVDL
21 SVMEDHSHSF DIKPFITVDF SSISAPHYED IPFTRADPMV ADYKYDLKLQ
71 EYQSAIKVEP ASPYYSEKT QLYNRPHEEP SNSLMAIECR VCGDKASGFH
121 YGVHACEGCK GFFRRTIRLK LIYDRCDLNC RIHKKS RNKC QYCRFQKCLA
171 VGM SHNAIRF GRMPQAEKEK LLAEISSDID QLNPE SADR ALAKHLYDSY
221 IKSFP LTKAK ARAILTGKTT DKSPFVIYDM NSLMMGEDKI KFKHITPLQE
271 QSKEVAIRIF QGCQFRSVEA VQEITEYAKN IPGFINDLN DQVTLKYG V
321 HEI IY TMLAS LMNKDGLIS EGQGFMTREF LKSLRKPF GD FMEPKFEFAV
371 KFNAL EDDS DLAI FIAVII LSGDRPGLLN VKPIEDIQDN LLQALELQLK
421 LNHPESSQLF AKVLQKMTDL RQIVTEHVQL LHVIKKTETD MSLHPLLQEI
471 YKDLY
```

Red letters: Sequence coverage of derivatized lysine

mapping of Ppary1

**Figure S1: The sequence coverage with different digestion.** Mass spectrometry was conducted of immune-precipitated Ppary in transfected HEK293 cells. Analysis totally covered >96% of the protein. (A) Chymotrypsin and trypsin mapping and sequence coverage of Ppary1. (B) Sequence coverage of derivatized lysine mapping of Ppary1.

A

| Acetylation position | Mascot score | Peptide sequence*                     |
|----------------------|--------------|---------------------------------------|
| 140                  | 25.14        | LK(ac)LIYDR                           |
| 154                  | 21.29        | IHK(ac)K*SR                           |
| 167                  | 20.55        | FQK(ac)C*LAVGM SHNAIR                 |
| 167                  | 20.53        | FQK(ac)C*LAVGM*SHNAIR                 |
| 167                  | 16.84        | NKC*QYC*RFQK(ac)C*LAVGM SHNAIR        |
| 188                  | 68.96        | MPQAEK(ac)EK*LLAEISSDIDQLNPESADLR     |
| 188                  | 52.69        | M*PQAEK(ac)EK*LLAEISSDIDQLNPESADLR    |
| 188                  | 65.16        | DRQAEK(ac)EKLLAEISSDIDQLNPESADLR      |
| 188                  | 38.36        | DRQAEK(ac)EK*LLAEISSDIDQLNPESADLR     |
| 188 & 190            | 35.42        | DRQAEK(ac)EK(ac)LLAEISSDIDQLNPESADLR  |
| 222                  | 53.46        | ALAK*HLYDSYIK(ac)SFPLTK*AK*AR         |
| 228                  | 39.70        | ALAK*HLYDSYIK*SFPLTK(ac)AK*AR         |
| 238/242              | 45.00        | AILTGK(ac)TTDK(ac)SPFVIYDMNSLMMGEDKIK |

\*asterisks indicate chemically-derivatized lysine positions  
 "ac" indicates lysine (K) residues that are acetylated

B

| Position <sup>1</sup> | Peptide sequence <sup>2</sup> | Mascot score <sup>3</sup> | Expect value <sup>3</sup> | Spectral counts <sup>4</sup> (p<0.05) <sup>5</sup> |                               |
|-----------------------|-------------------------------|---------------------------|---------------------------|----------------------------------------------------|-------------------------------|
|                       |                               |                           |                           | w/ dynamic exclusion <sup>6</sup>                  | inclusion filter <sup>7</sup> |
| K154                  | IHK(Ac)K*SR                   | 21                        | 0.015                     | 7 (3)                                              | 5 (2)                         |
| unmodified            | IHK*KSR                       | 29                        | 0.0041                    | 1 (0)                                              | 25 (14)                       |
| unmodified            | IHKK*SR                       | 33                        | 0.0035                    | 4 (2)                                              | 16 (10)                       |
| unmodified            | IHK*K*SR                      | 37                        | 0.0005                    | 8 (6)                                              | 235 (225)                     |

Notes:

1. position of native acetylated residue
2. "Ac" indicates acetylated amino acid.
3. \*chemically-derivatized lysine position
4. Mascot scores and values for the top peptide hit
5. spectral counts for peptide queries with an Expect value less than 0.1
6. in parenthesis are spectral counts for peptide queries with a probability score less than 0.05
7. from LC-MS/MS runs that use dynamic exclusion to increase the diversity of the sample set
8. from LC-MS/MS runs filter peptides based on their m/z value and only conduct MS/MS fragmentation analysis on peptides with a m/z between 383 – 431.

**Figure S2: Peptide mapping the basic region of Ppary (a.a. positions 152-157).** (A) Mass spectrometry identified nine acetylated lysine residues by a chemical-derivatization protocol. (B) LC-MS/MS analysis of derivatized Ppary after trypsin digestion. The spectral counts and Mascot scores for acetylated peptides were shown.
